# Supplementary material
Source: publisher figshare collection journal article supplement (https://frontiersin.figshare.com/ndownloader/files/31256968)
Supplement: Supplementary file [file 31256968]

## Description of Supplementary Material files

|    | File name                                    | Description                                                                                                                                                                                                      |
|----|----------------------------------------------|------------------------------------------------------------------------------------------------------------------------------------------------------------------------------------------------------------------|
| 1. | Demographic_Phase_I.csv                      | This file is not cited in the text. This is the demographic data for Phase I participants. This file also includes the descriptions elicited from the actors (i.e., Phase I participants).                       |
| 2. | Demographic_Phase_II.csv                     | This file is not cited in the text. This is the demographic data for Phase 2 participants.                                                                                                                       |
| 3. | Instructions for Procedure - Phase II.docx   | These are the instructions that were included in the Qualtrics survey (Phase II).                                                                                                                                |
| 4. | Reproducible Code for Judges Decision.docx   | This is Rmarkdown code for running the analyses for judges' decisions. Frontiers does not allow Rmd files to be uploaded. Instructions for converting the Word document to Rmd are included on the first page.   |
| 5. | Judges_Decision_Data.csv                     | Judges' decision data.                                                                                                                                                                                           |
| 6. | Principal Components Analysis.docx           | Results of the Principal Components Analysis (PCA) that was performed on the random effects to determine the optimal random-effects structure using the rePCA() function in the lme4 package.                    |
| 7. | Reproducible Code for Judges Reasoning.docx  | This is Rmarkdown code for running the analyses for judges' reasoning. Frontiers does not allow Rmd files to be uploaded. Instructions for converting the Word document to Rmd are included on the first page.   |
| 8. | Judges_Reasoning_Data.csv                    | Judges' reasoning data that were analyzed using LIWC.                                                                                                                                                            |
| 9. | Exploratory Analyses for Reasoning Data.docx | The 14 linguistic features were entered as the dependent variable in separate GLMMs, with each model predicting a separate linguistic feature. This document contains the results of these exploratory analyses. |
